# Supplementary material
Source: PubMed Central journal article supplement (PMC4116393)
Supplement: figS1.pdf [file figS1.pdf]

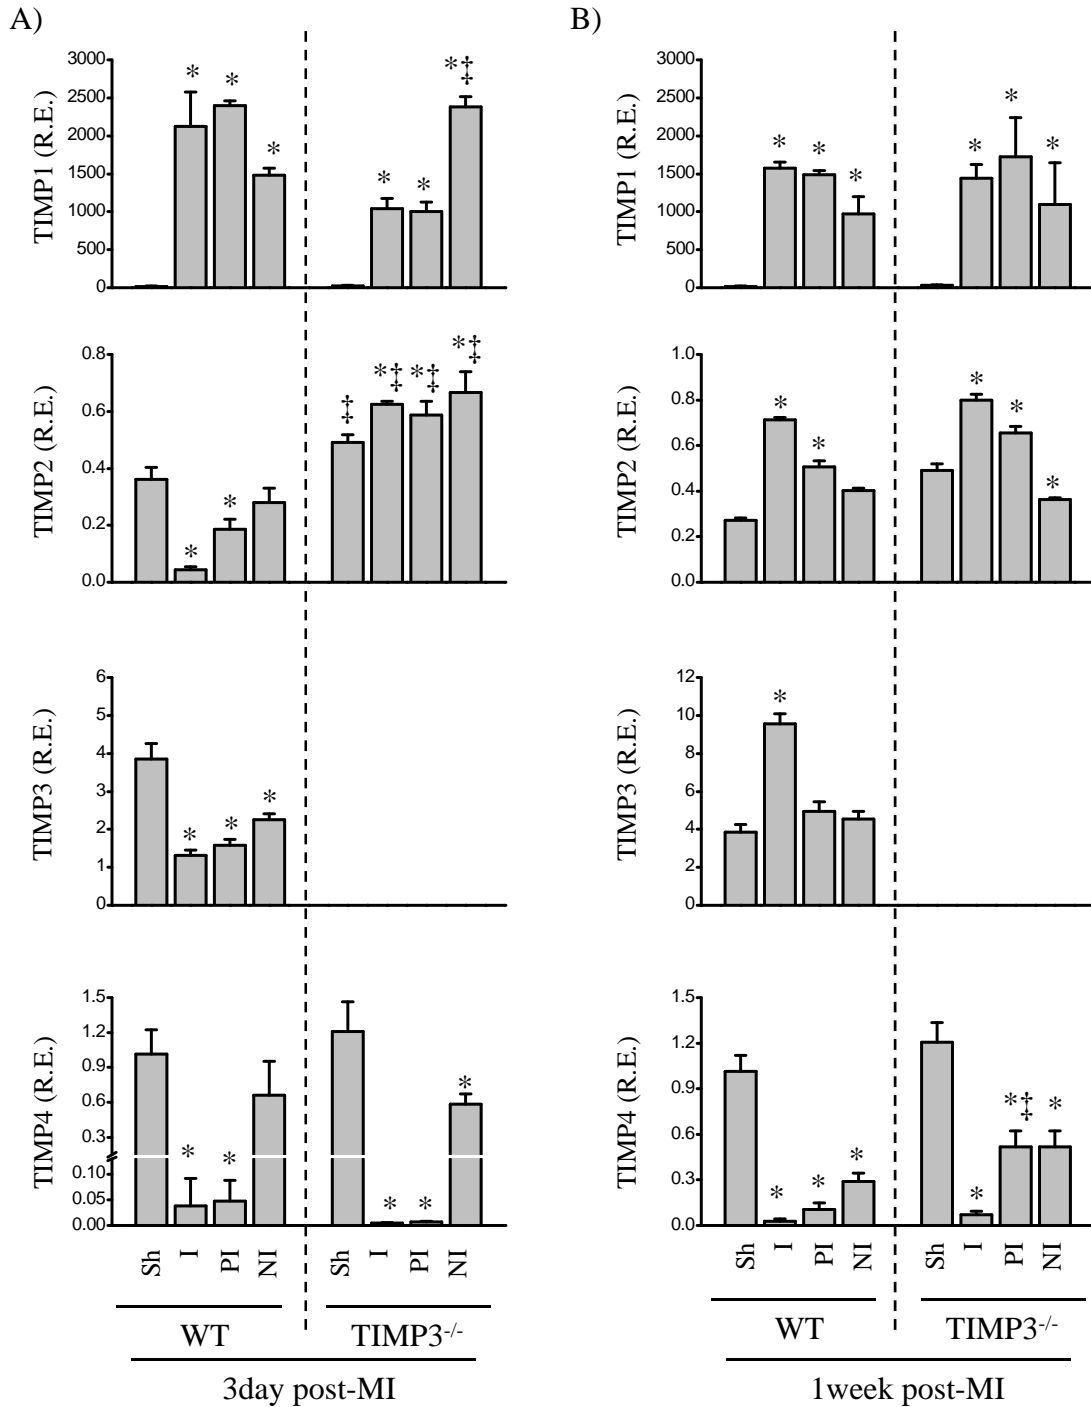

**Supplemental Figure 1 –**

Expression of TIMPs is altered differentially between WT and TIMP3<sup>-/-</sup> mice post-MI. mRNA expression of TIMP1, TIMP2, TIMP3 and TIMP4 in sham, infarct (I), peri-infarct (PI) and non-infarct (NI) regions of WT and TIMP3<sup>-/-</sup> heart at 3days (A) and 1 week post-MI (B). R.E.=Relative Expression, MI=myocardial infarction. Presented values are Mean ± SEM. \*p<0.05 compared to sham, †p<0.05 compared to WT.
